# Supplementary material for: Phylogenetic and structural analysis of centromeric DNA and kinetochore proteins
Source: PubMed Central journal article supplement (PMC1557759; doi:10.1186/gb-2006-7-3-r23), 2006-03-22

Spc34/NYD-SP28 family

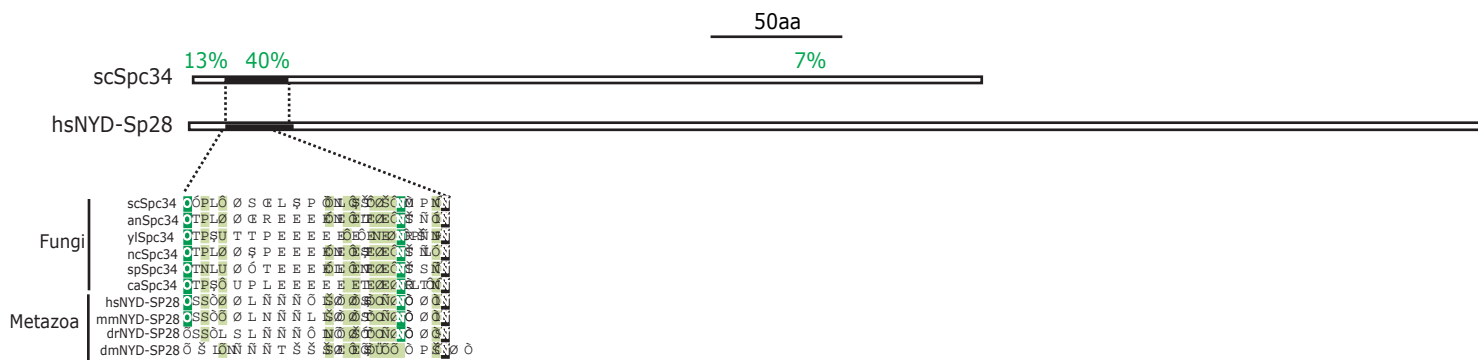

Supplement: gb-2006-7-3-r23-S2.pdf [file gb-2006-7-3-r23-S2.pdf]
