# Supplementary material for: Phylogenetic and structural analysis of centromeric DNA and kinetochore proteins
Source: PubMed Central journal article supplement (PMC1557759; doi:10.1186/gb-2006-7-3-r23), 2006-03-22
Supplement: gb-2006-7-3-r23-S4.pdf [file gb-2006-7-3-r23-S4.pdf]

Meraldi et al.  
Additional data file 4

| Additional data file 4: amino acid similarities |                           |
|-------------------------------------------------|---------------------------|
| Amino Acid                                      | Similar Amino Acids       |
| A                                               | S, G                      |
| C                                               | S                         |
| D                                               | E, H, K, N, Q, R          |
| E                                               | D, H, K, N, Q, R          |
| F                                               | H, I, L, V, W, Y          |
| G                                               | A, P, S                   |
| H                                               | D, E, F, K, N, Q, R, W, Y |
| I                                               | F, L, M, V                |
| K                                               | D, E, H, N, Q, R          |
| L                                               | F, I, M, V                |
| M                                               | I, L, V                   |
| N                                               | E, D, H, K, Q, R          |
| P                                               | G                         |
| Q                                               | D, E, H, K, N, R          |
| R                                               | D, E, H, K, N, Q          |
| S                                               | A, C, G, T                |
| T                                               | S                         |
| V                                               | F, I, L, M                |
| W                                               | F, H, Y                   |
| Y                                               | F, H, W                   |
