# Supplementary material for: Phylogenetic and structural analysis of centromeric DNA and kinetochore proteins
Source: PubMed Central journal article supplement (PMC1557759; doi:10.1186/gb-2006-7-3-r23), 2006-03-22
Supplement: gb-2006-7-3-r23-S5.pdf [file gb-2006-7-3-r23-S5.pdf]

Meraldi et al.  
Additional data file 5

| Additional data file 5: Conserved Blocks and positions used for phylogenetic analysis |                                                                                                                        |                                 |
|---------------------------------------------------------------------------------------|------------------------------------------------------------------------------------------------------------------------|---------------------------------|
| <b>Protein</b>                                                                        | <b>Conserved Blocks</b>                                                                                                | <b>Number of positions used</b> |
| Ndc80                                                                                 | 199-204, 206-240, 247-251, 253-267, 269-275, 283-312, 316-328, 477-484, 521-531, 557-581, 586-605, 828-852 and 866-874 | 201                             |
| Nuf2                                                                                  | 85-97, 123-141, 222-231, 237-253, 319-330, 334-359, 369-385, 403-412, 489-493, 578-585 and 596-603                     | 145                             |
| PCNA                                                                                  | 1-6, 20-106, 110-142, 148-197, 300-347 and 363-377                                                                     | 239                             |
| SRP54                                                                                 | 1-24, 39-65, 86-104, 131-135, 156-365, 380-389, 392-421, 432-457, 515-549, 586-600 and 644-654                         | 412                             |
| $\alpha$ -Tubulin                                                                     | 2-9, 21-48 and 61-460                                                                                                  | 436                             |
